# Supplementary material
Source: Springer Nature journal article supplement (https://www.springermedizin.de/resource/supplementary/12950_2006_35_MOESM3_ESM.pdf/9557798)
Supplement: MOESM3 [file 9557798]

Eotaxin     IL-4     P-Selectin     Blank     POS  
 CD40     IL-3     MIP-3  $\alpha$      Blank     POS  
 bFGF     IL-2     M-CSF     Blank     Blank  
 BLANK     IL-1  $\beta$      MCP1     Blank     Blank  
 POS NEG     IL-1  $\alpha$      L-Selectin     Blank     Blank  
 POS NEG     IFN  $\gamma$      IL-13     VEGF  
 POS NEG     GM-CSF     IL-6     TNF  $\alpha$   
 POS NEG     GCSF     IL-5     RANTES

**A.**

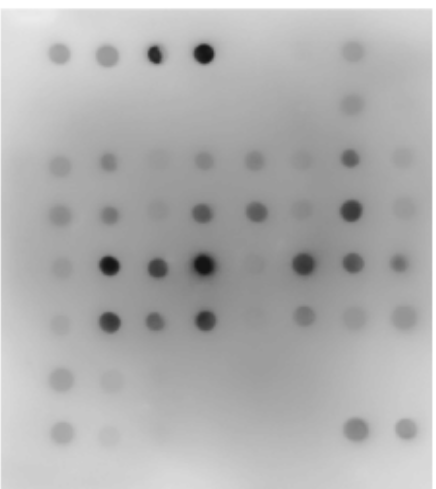

**C.**

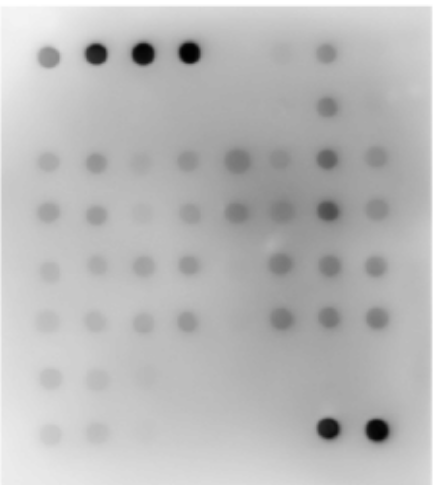

**B.**
